# Supplementary material for: Metallocatanionic vesicle-mediated enhanced singlet oxygen generation and photodynamic therapy of cancer cells
Source: Royal Society of Chemistry journal article supplement (doi:10.1039/d2tb00011c), 2022-01-01
Supplement: d2tb00011c1.pdf [file d2tb00011c1.pdf]

1 *Supporting information*

2 **Metallocatanionic vesicles mediated enhanced singlet oxygen generation and**  
3 **photodynamic therapy of cancer cells**

4 Bunty Sharma<sup>1,2,a</sup>, Akhil Jain<sup>3,a</sup>, Lluïsa Pérez-García<sup>2,4,5\*</sup>, Julie A Watts<sup>3</sup>, Frankie J. Rawson<sup>3</sup>,  
5 Ganga Ram Chaudhary<sup>1</sup>, and Gurpreet Kaur<sup>1\*</sup>

6 <sup>1</sup> Department of Chemistry, Centre for Advanced Studies in Chemistry, Panjab University,  
7 Chandigarh-160014, India

8 <sup>2</sup> Division of Advanced Materials and Healthcare Technologies, School of Pharmacy,  
9 University of Nottingham, Nottingham NG7 2RD, UK

10 <sup>3</sup> Division of Regenerative Medicine and Cellular Therapies, School of Pharmacy, University  
11 of Nottingham, Nottingham NG7 2RD, UK

12 <sup>4</sup> Departament de Farmacologia, Toxicologia i Química Terapèutica, Facultat de Farmàcia i  
13 Ciències de l'Alimentació, Avda. Joan XXIII 27-31, Universitat de Barcelona, 08028  
14 Barcelona, Spain

15 <sup>5</sup> Institut de Nanociència i Nanotecnologia UB (IN2UB), Universitat de Barcelona 08028  
16 Barcelona, Spain

17 <sup>a</sup>These authors have contributed equally to this work.

18

19

20 \*corresponding authors: Gurpreet Kaur (email: [gurpreet14@pu.ac.in](mailto:gurpreet14@pu.ac.in))

21 Lluïsa Perez-Garcia (email: [mlperez@ub.edu](mailto:mlperez@ub.edu))

22

23 **Table S1.** List of the PDI value calculated for all fraction at 1 mM and 0.1 mM concentration

| <b>FeCPC I:Na Ol</b> | <b>PDI (1 mM)</b> | <b>PDI (0.1 mM)</b> |
|----------------------|-------------------|---------------------|
| <b>V19</b>           | 0.230             | 0.203               |
| <b>V28</b>           | 0.206             | 0.263               |
| <b>V37</b>           | 0.495             | 0.444               |
| <b>V46</b>           | 0.355             | 0.384               |
| <b>V55</b>           | 0.395             | 0.376               |
| <b>V64</b>           | 0.333             | 0.347               |
| <b>V73</b>           | 0.430             | 0.383               |
| <b>V82</b>           | 0.501             | 0.544               |
| <b>V91</b>           | 0.762             | 0.694               |

24

25 **Table S2.** Metallocatanionic vesicles measured size and PDI value of V37 and V73 fraction  
26 till 1 month.

| <b>Time</b>                | <b>V37</b>       |            | <b>V73</b>       |            |
|----------------------------|------------------|------------|------------------|------------|
|                            | <b>Size (nm)</b> | <b>PDI</b> | <b>Size (nm)</b> | <b>PDI</b> |
| <b>Fresh sample</b>        | 142.2            | 0.278      | 196.8            | 0.38       |
| <b>1<sup>st</sup> Week</b> | 236.6            | 0.456      | 214              | 0.45       |
| <b>2<sup>nd</sup> Week</b> | 277.8            | 0.470      | 182.3            | 0.43       |
| <b>1 month</b>             | 253.8            | 0.480      | 204.8            | 0.36       |

27

28 **Table S3.** Metallocatanionic vesicles measured size and PDI value of MB@V37 and  
29 MB@V73 fraction at different pH.

| <b>Time</b>                | <b>pH = 9</b>    |            |                  |            | <b>pH = 7</b>    |            |                  |            | <b>pH = 5</b>    |            |                  |            |
|----------------------------|------------------|------------|------------------|------------|------------------|------------|------------------|------------|------------------|------------|------------------|------------|
|                            | <b>MB@V37</b>    |            | <b>MB@V73</b>    |            | <b>MB@V37</b>    |            | <b>MB@V73</b>    |            | <b>MB@V37</b>    |            | <b>MB@V73</b>    |            |
|                            | <b>Size (nm)</b> | <b>PDI</b> |
| <b>Fresh sample</b>        | 244              | 0.49       | 311              | 0.25       | 292              | 0.56       | 323              | 0.28       | 322              | 0.55       | 455              | 0.47       |
| <b>1<sup>st</sup> Week</b> | 260              | 0.64       | 370              | 0.36       | 292              | 0.63       | 444              | 0.31       | 366              | 0.59       | 445              | 0.60       |
| <b>2<sup>nd</sup> Week</b> | 439              | 0.76       | 458              | 0.74       | 516              | 0.74       | 405              | 0.60       | 344              | 0.80       | 302              | 0.70       |

30

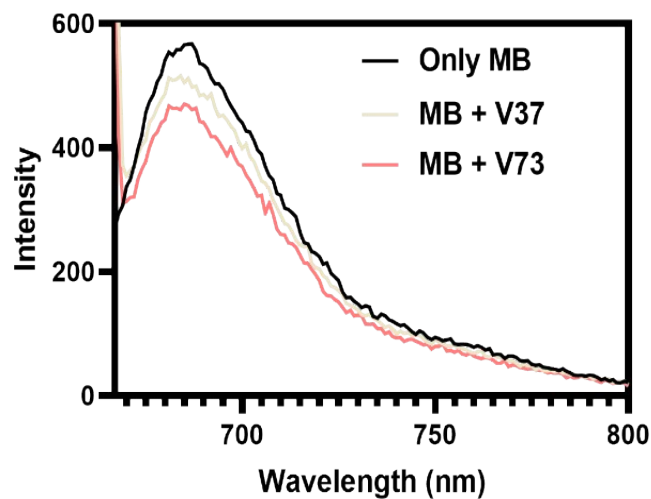

31  
32  
33

**Fig. S1** Fluorescence emission spectra of free MB and MB containing vesicles.

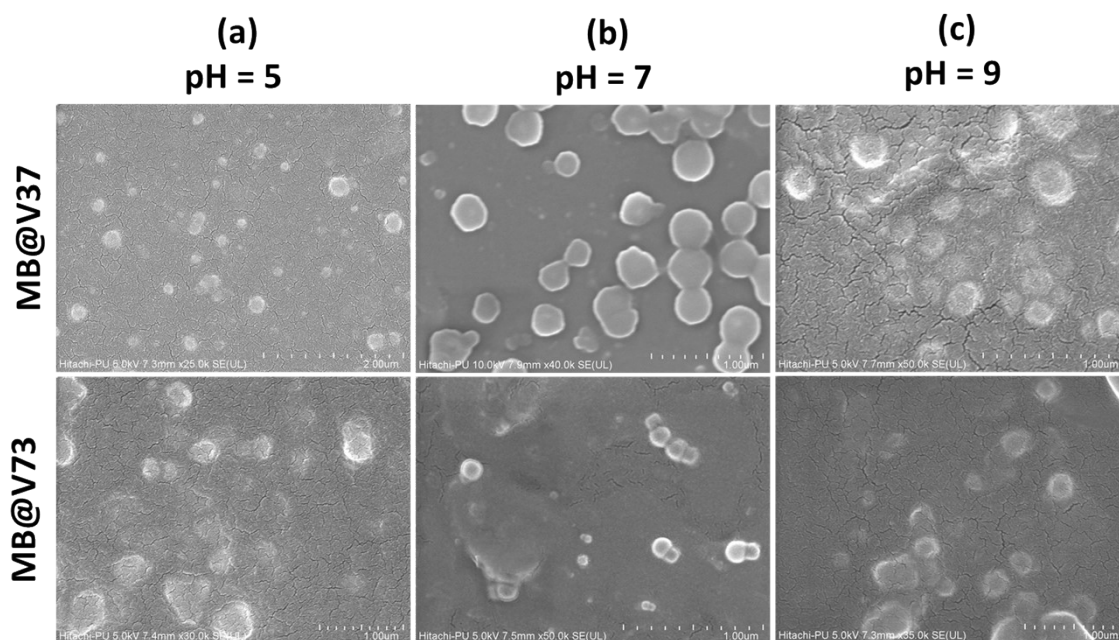

34  
35  
36  
37  
38

**Fig. S2** MB@MCVs morphology characterization images, FE-SEM images of MB with V37 and V73 fractions at pH (a) 5, (b) 7 and (c) 9.

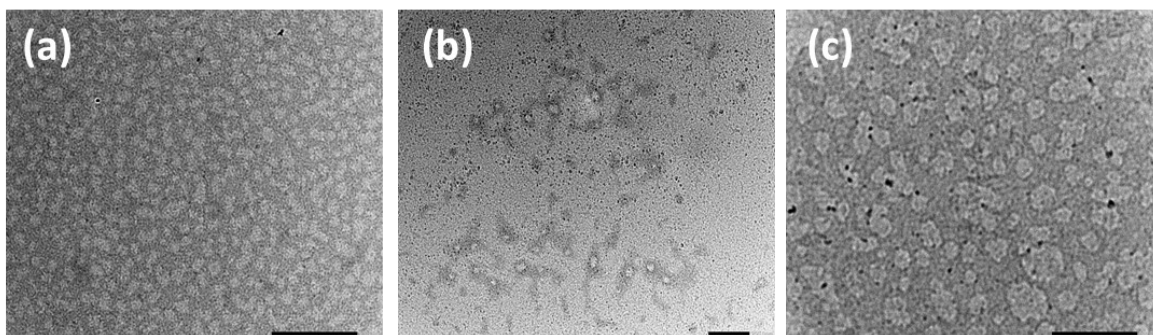

39

40 **Fig. S3 MB@MCVs morphology characterization images, HR-TEM images of MB with**  
 41 **V73 at pH (a) 5, (b) 7 and (c) 9. (size bar 1 μm).**

42

43

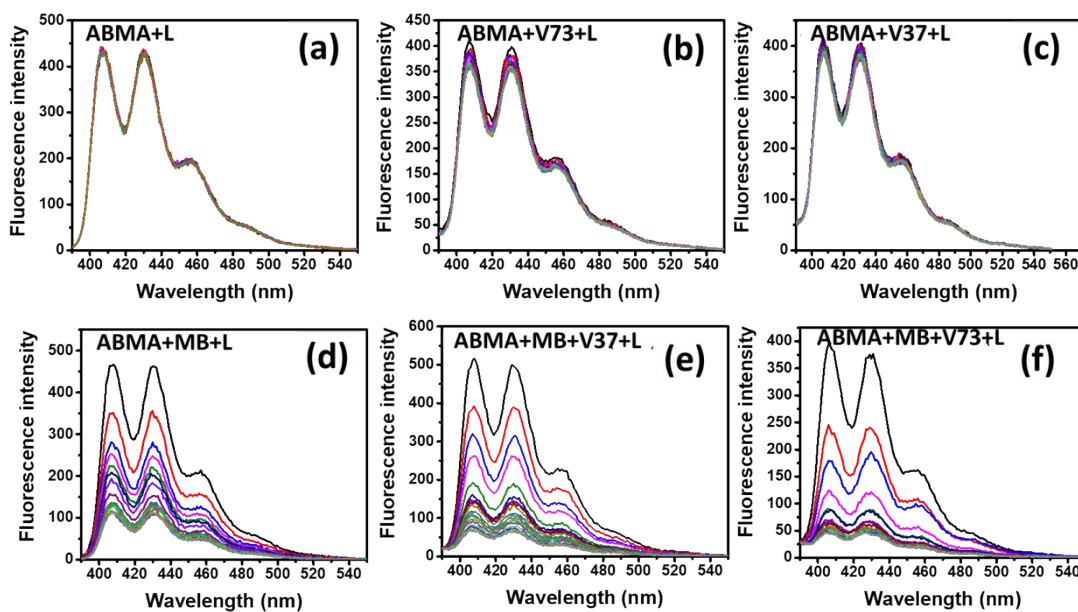

44

45 **Fig. S4 Fluorescence emission spectra of ABMA after different treatments (a) only Laser (L)**  
 46 **(b) only V73+L (c) V37+L (d) MB + L (e) MB+V37+L (f) MB+V73+L.**

47

48

49

50

51

52

53

54

55

56

57

58

59

60

61

62

63

64

65

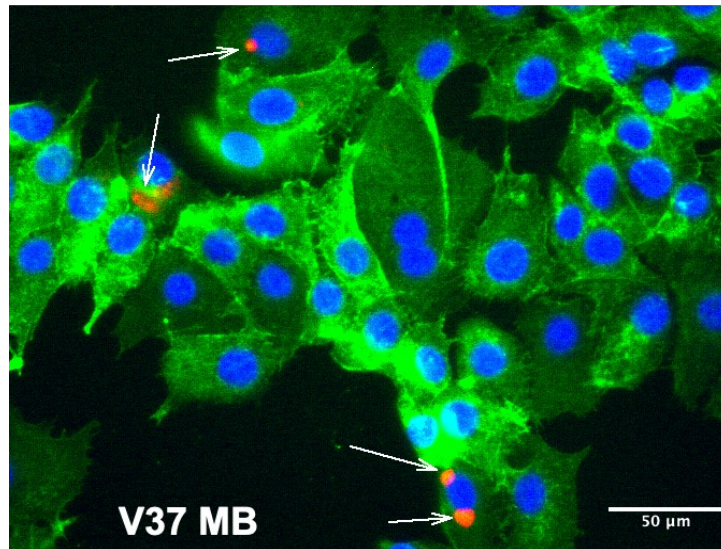

66

67

68

69

70

71

72

73

74

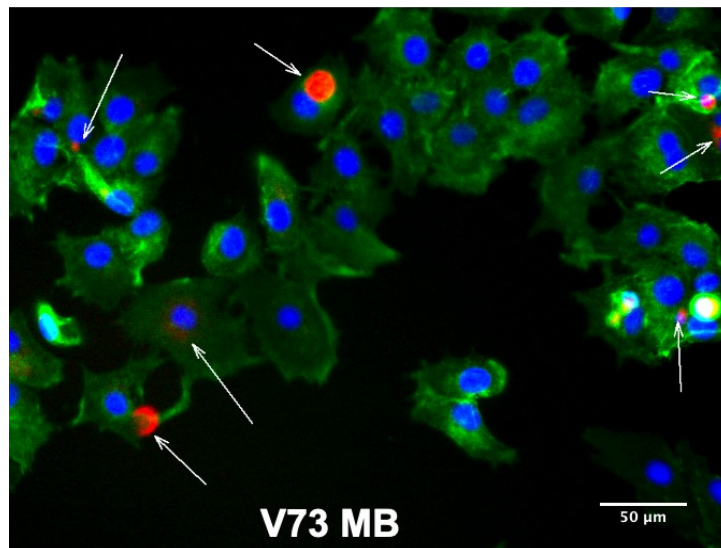

75

76

**Fig. S5** Zoomed images of cellular uptake of MB-loaded MCVs.

77

78

79

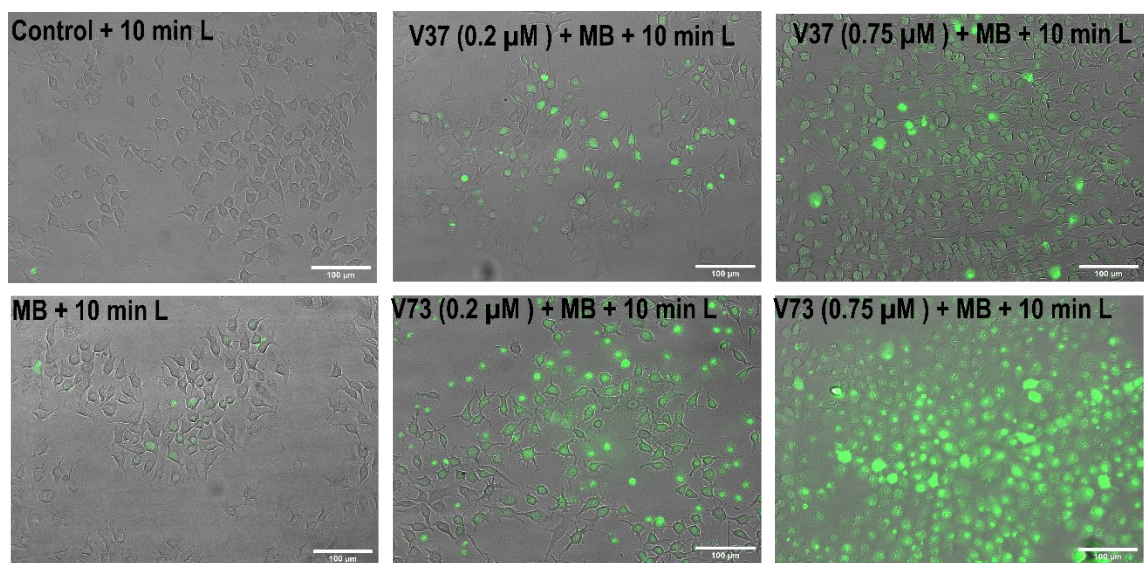

80

81 **Fig. S6** Intracellular singlet oxygen generation in MCF-7 cells treated with MB-loaded MCVs  
82 upon irradiation with 650 nm laser for 10 min. Overlay images (fluorescent microscopy +  
83 Bright field) showing  $^1\text{O}_2$  generation from different MCVs. Scale bars = 100  $\mu\text{m}$ .
